# Supplementary material for: A facile green antisolvent approach to Cu2+-doped ZnO nanocrystals with visible-light-responsive photoactivities
Source: Royal Society of Chemistry journal article supplement (doi:10.1039/c4nr01607f), 2014-05-23
Supplement: c4nr01607f1.pdf [file c4nr01607f1.pdf]

Supplementary Information

## A Facile Green Antisolvent Approach to $\text{Cu}^{2+}$ -doped ZnO

### Nanocrystals with Visible-Light-Responsive Photoactivities

Yi-Hsuan Lu,<sup>1†</sup> Wei-Hao Lin,<sup>1†</sup> Chao-Yao Yang,<sup>1</sup> Yi-Hsuan Chiu,<sup>1</sup> Ying-Chih Pu,<sup>1</sup>  
Min-Han Lee,<sup>2</sup> Yuan-Chieh Tseng,<sup>1</sup> and Yung-Jung Hsu<sup>1\*</sup>

<sup>1</sup> Department of Materials Science and Engineering, National Chiao Tung University, Hsinchu, Taiwan 30010, Republic of China.

<sup>2</sup> Undergraduate Honors Program of Nano Science & Engineering, National Chiao Tung University, Hsinchu, Taiwan 30010, Republic of China.

\*E-mail: [yhsu@cc.nctu.edu.tw](mailto:yhsu@cc.nctu.edu.tw)

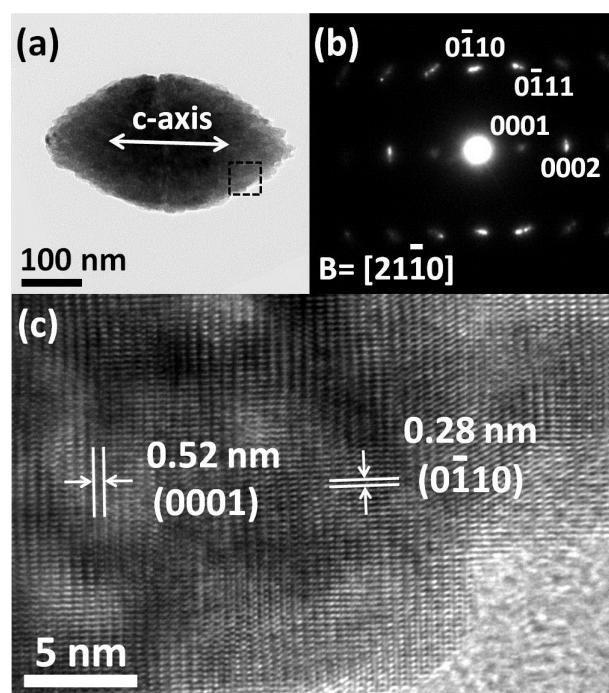

**Fig. S1** (a) TEM image, (b) SAED pattern and (c) HRTEM image of pure ZnO nanocrystals obtained from antisolvent process.

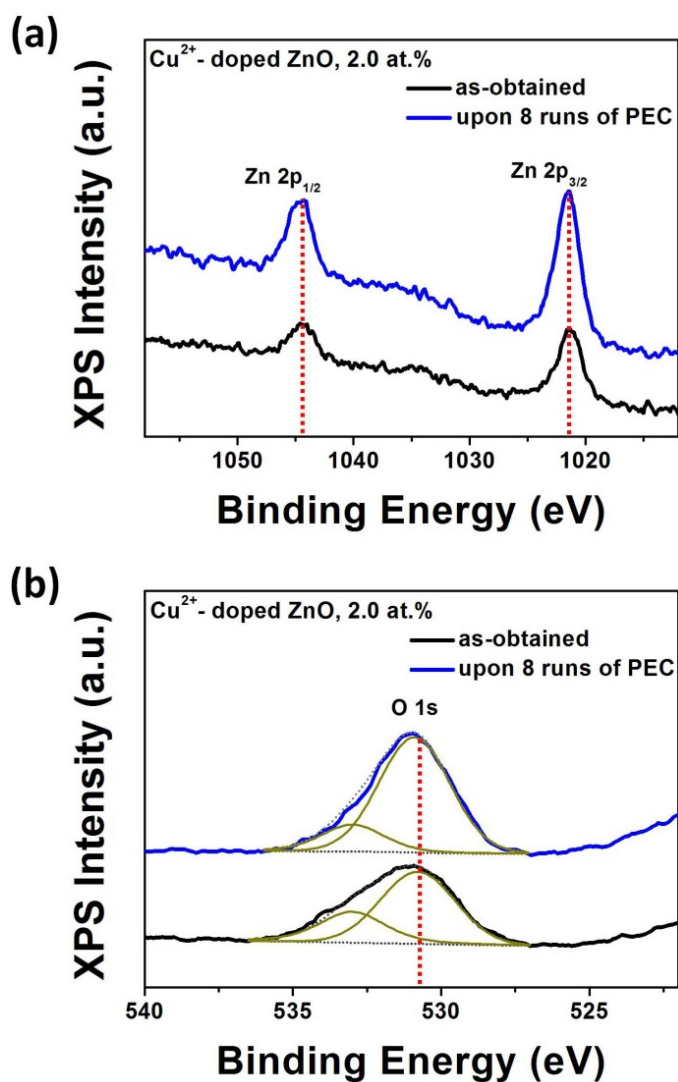

**Fig. S2** XPS spectra of  $\text{Cu}^{2+}$ -doped ZnO nanocrystals before and after 8 runs of photoelectrochemical measurement. The Zn 2p signals were consistent with the presence of ZnO with the binding energy of 1022 and 1045 eV for Zn  $2p_{1/2}$  and Zn  $2p_{3/2}$ , respectively. The deconvolution of O 1s produced two peaks which were assigned to the O-H species (533 eV) and Zn-O bonding (531 eV).<sup>[1]</sup> No appreciable change in the binding energy of Zn 2p and O 1s was observed upon 8 runs of measurement. Each run contained an  $I$ - $t$  scan for an on/off cycle of light illumination (200 sec).

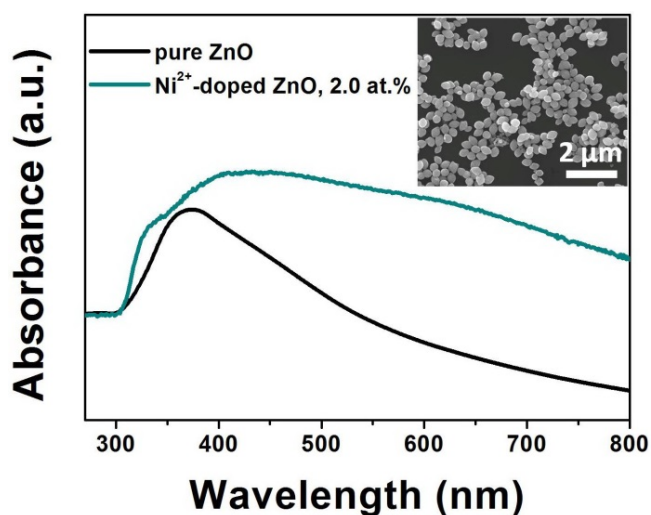

Fig. S3 UV-visible absorption spectra of the pure ZnO and Ni<sup>2+</sup>-doped ZnO nanocrystals. The inset shows an SEM image of Ni<sup>2+</sup>-doped ZnO.

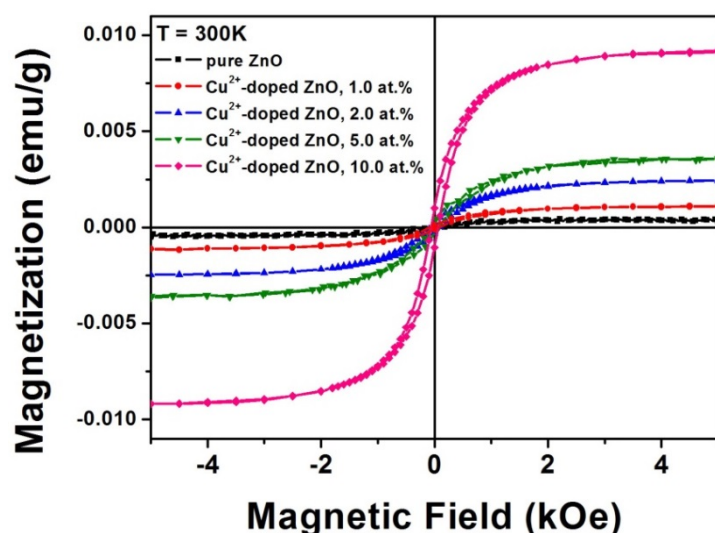

Fig. S4 Magnetic hysteresis curves of the pure ZnO and Cu<sup>2+</sup>-doped ZnO nanocrystals with different Cu<sup>2+</sup> concentrations measured at 300K. Well-defined hysteresis loops were observed in the Cu<sup>2+</sup>-doped ZnO, indicative of the phenomenon of the room temperature ferromagnetism. Due to promoted coupling of Cu<sup>2+</sup> with the host lattice,<sup>[2]</sup> saturation magnetization is enhanced with increasing Cu<sup>2+</sup> concentrations.

## References

- [1] (a) Z. Li, Y. Xiong and Yi Xie, *Inorg. Chem.*, 2003, **42**, 8105. (b) A. Prakash, S. K. Misra and D. Bahadur, *Nanotechnology*, 2013, **24**, 095705.
- [2] (a) J. M. D. Coey, M. Venkatesan and C. B. Fitzgerald, *Nat. Mater.* 2005, **4**, 173. (b) D. Y. Inamdar, A. K. Pathak, I. Dubenko and N. Ali, S. Mahamuni, *J. Phys. Chem. C* 2011, **115**, 23671.
